# Supplementary material for: Detection and Quantification of Viable but Non-culturable Campylobacter jejuni
Source: PubMed Central journal article supplement (PMC6965164; doi:10.3389/fmicb.2019.02920), 2020-01-10
Supplement: Image_1.pdf [file Image_1.pdf]

## Supplementary Information

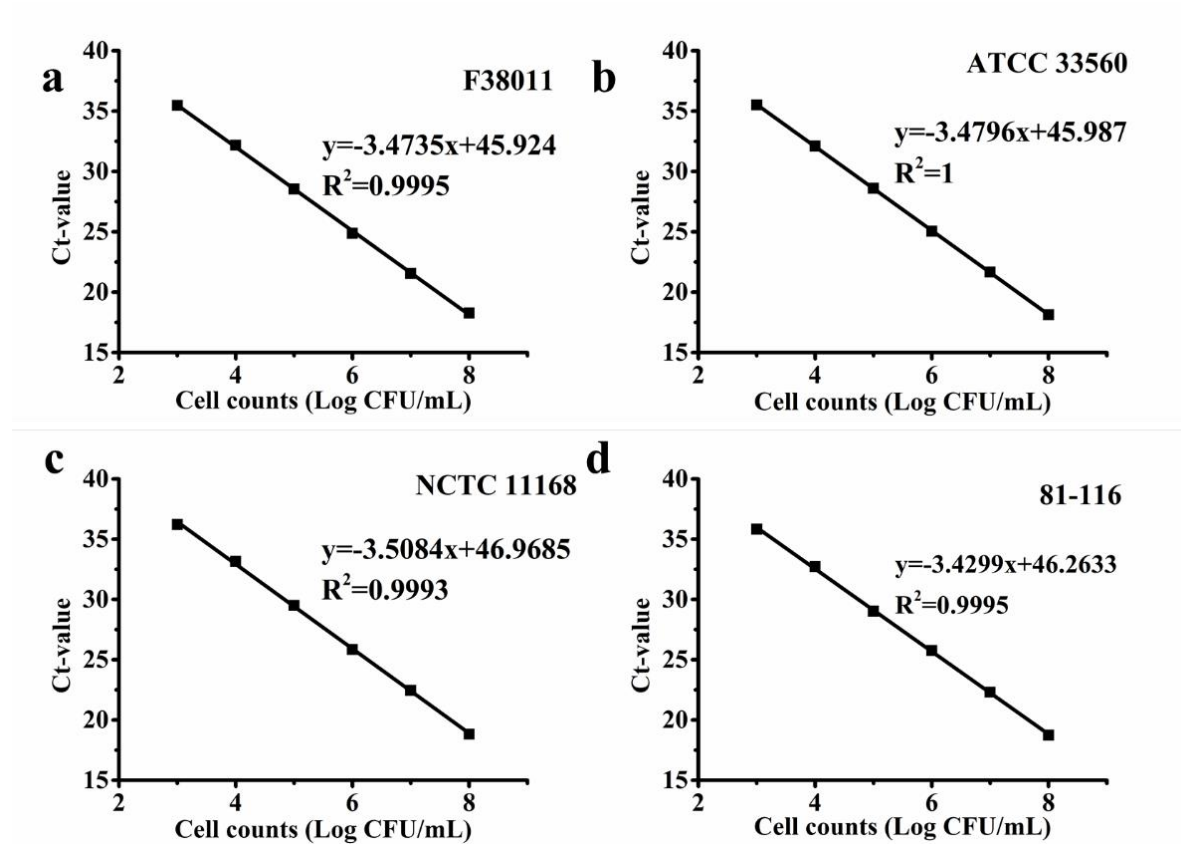

**Figure S1.** Standard curves produced from 10-fold serial dilutions of four different *C. jejuni* strains (a-d) ranging from 3 to 8 log CFU/mL. PMA-treated genomic DNA was extracted using the Presto Mini gDNA Bacteria Kit. Each data point represents three replicates.
